# Supplementary material
Source: PubMed Central journal article supplement (PMC5336491)
Supplement: NIHMS843864-supplement-01.pdf [file NIHMS843864-supplement-01.pdf]

## Supporting Information

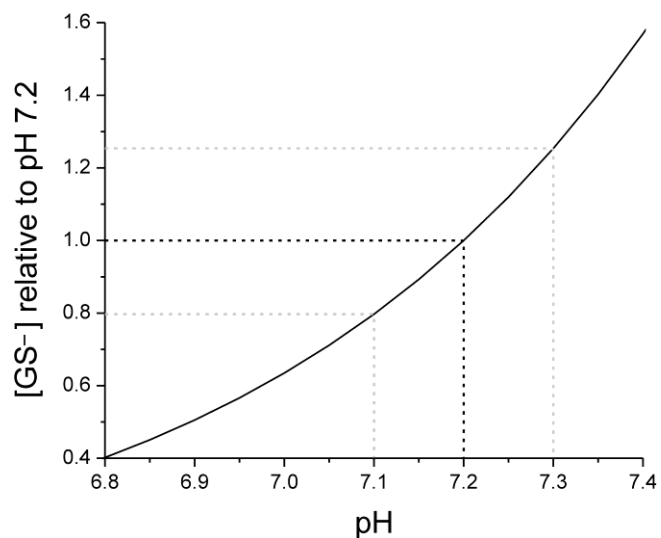

**Figure S1.** Variation of the concentration of the thiolate form of GSH near physiologic pH. Relative abundance of the nucleophilic thiolate form of GSH ( $\text{GS}^-$ ) as a function of pH; values are normalized to  $[\text{GS}^-]$  at pH 7.2 (indicated by the black dotted line). As shown by the gray dotted lines, shifting pH by  $\pm 0.1$  causes  $[\text{GS}^-]$  to change by more than  $\pm 20\%$ . The values were computed using the microscopic proton dissociation constants of GSH, as previously described <sup>4</sup>.
